# Supplementary material for: Alkaline ceramidase 2 is a novel direct target of p53 and induces autophagy and apoptosis through ROS generation
Source: PubMed Central journal article supplement (PMC5353723; doi:10.1038/srep44573), 2017-03-15
Supplement: srep44573-s1.pdf [file srep44573-s1.pdf]

## Supplementary Information for

### **Alkaline ceramidase 2 is a novel direct target of p53 and induces autophagy and apoptosis through ROS generation**

Yitao Wang<sup>1,2#</sup>, Chunxue Zhang<sup>1,2#</sup>, Yuelei Jin<sup>1,2</sup>, Sen Wang<sup>1,2</sup>, Qing He<sup>1,2</sup>, Zhu Liu<sup>1,2</sup>,  
Qing Ai<sup>1,2</sup>, Yunlong Lei<sup>1,2</sup>, Yi Li<sup>1,2</sup>, Fangzhou Song<sup>1,2</sup>, and Youquan Bu<sup>1,2\*</sup>

<sup>1</sup> Department of Biochemistry and Molecular Biology, and <sup>2</sup> Molecular Medicine and Cancer Research Center, Chongqing Medical University, Chongqing 400016, China

# These authors contributed equally to this work.

\* To whom all correspondence should be addressed. Youquan Bu. Department of Biochemistry and Molecular Biology, ChongQing Medical University. 1# Yixueyuan Road, Yuzhong District, ChongQing 400016 China. Tel: +86-23-68485991; E-mail: buyqcn@cqmu.edu.cn, buyqcn@aliyun.com

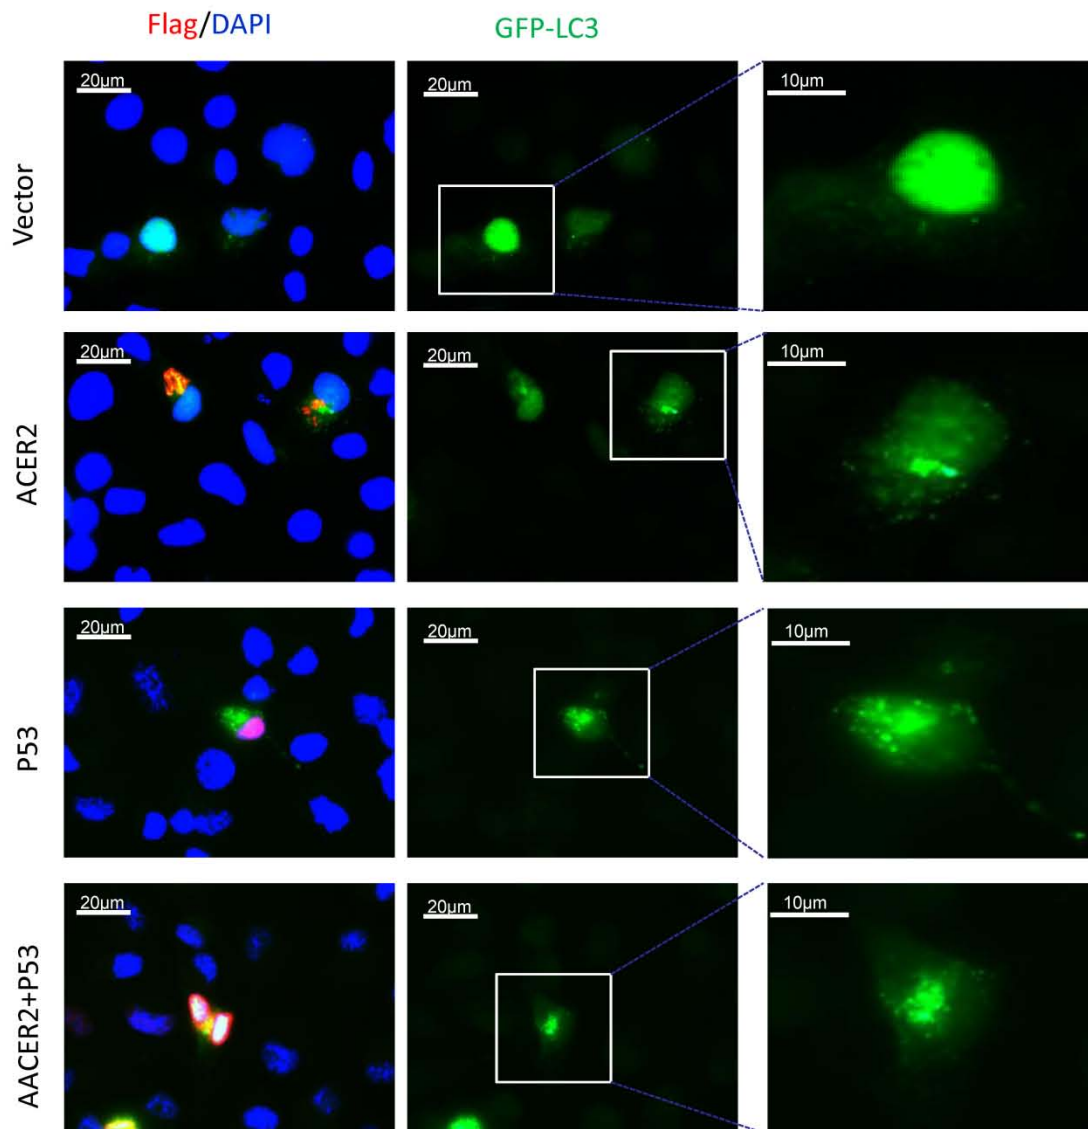

**Supplementary Figure 1. ACER2 overexpression autophagy induces autophagosome formation.**

H1299 cells were transiently transfected with empty vector, ACER2 and/or p53 expression plasmids together with GFP-LC3 expressing plasmid. Forty-eight hours after transfection, cells were assayed for the appearance of autophagosomes with the formation of GFP-LC3 puncta by confocal microscopy. Ectopic Flag-ACER2 and Flag-p53 expression were determined by indirect immunofluorescence assay with Flag antibodies (red). Cell nuclei were stained with DAPI (blue).

## Supplementary Table 1. Oligonucleotides used in the present study

### Primers used for RACE analysis

| Primer name | Primer sequences                   |
|-------------|------------------------------------|
| GSP1-325    | 5'-TGCTGATCGTGTGTTGTAGAACTCGGCG-3' |
| GSP2-601    | 5'-CACTGACCACCACCTTGAACCTACCC-3'   |

### Primers used for RT-PCR analysis

| Gene name | Primer sequence                     |
|-----------|-------------------------------------|
| GAPDH     | F833: 5'-ACCTGACCTGCCGTCTAGAA-3'    |
|           | R1060: 5'-TCCACCACCCTGTTGCTGTA-3'   |
| ACER2     | F562: 5'-GTAGGTTCAAGGTGGTGGTCAG-3'  |
|           | R680: 5'-CACACGCATGTTGTCACACCT-3'   |
| P21       | F990: 5'-ATGAAATTCACCCCTTTCC-3'     |
|           | R1163: 5'-CCCTAGGCTGTGCTCACTT-3'    |
| Bax       | F112: 5'-GAGCTGCAGAGGATGATTGC-3'    |
|           | R313: 5'-CCAATGTCCAGCCCATGATG-3'    |
| MDM2      | F659: 5'-AGCAGGAATCATCGGACTCA-3'    |
|           | R877: 5'-TGTGGCGTTTTCTTTGTCGT-3'    |
| P53       | Forward: 5'-GTTCCGAGAGCTGAATGAGG-3' |
|           | Reverse: 5'-TCTGAGTCAGGCCCTTCTGT-3' |

### Primers used for ChIP analysis

| Primer name      | Primer sequence               | Amplified region |
|------------------|-------------------------------|------------------|
| ACER2-ChIP-F2541 | 5'-GGAACCAGGGGTCTGTGTCA-3'    |                  |
| ACER2-ChIP-R2684 | 5'-AGGTATTCAGGGCAAAAAGC-3'    | (+459 ~ +602 bp) |
| ACER2-ChIP-F2763 | 5'-ACCCCAAGAACATGCCTATAA-3'   |                  |
| ACER2-ChIP-R2914 | 5'-AGACTTCAGAACTGGAGAAAGCA-3' | (+681 ~ +832 bp) |
| P21-ChIP-F       | 5'-GTGGCTCTGATTGGCTTTCTG-3'   |                  |
| P21-ChIP-R       | 5'-CTGAAAACAGGCAGCCCAAG-3'    |                  |

### siRNAs

| Name                   | Sequences                              |
|------------------------|----------------------------------------|
| Negative control siRNA | Sense: 5'-UUCUCCGAACGUGUCACGUUU-3'     |
|                        | Antisense: 5'-AAACGUGACACGUUCGGAGAA-3' |
| ACER2 siRNA            | Sense: 5'-GCCUGCCAUCAACAACAUCTT-3'     |
|                        | Antisense: 5'-GAUGUUGUUGAUGGCAGGCTT-3' |
| ATG5 siRNA             | Sense: 5'-CCAACUUGUUUCACGCUAUTT-3'     |
|                        | Antisense: 5'-AUAGCGUGAAACAAGUUGGTT-3' |

## Supplementary Table 2. Luciferase reporter construction

| Constructs       | Methods               | Primers and/or Enzymes used                                                                                                                                                     |
|------------------|-----------------------|---------------------------------------------------------------------------------------------------------------------------------------------------------------------------------|
| P1258(-470/+815) | PCR based cloning     | F(1613): 5'-ACC GAG CTC ACT TCT CTG GTG TAA GCA CTG GC-3' <i>Sac</i> I<br>R(2897): 5'-CTA GCT AGC AAA GCA CAG TCC TGG GGG AGT TG-3' <i>Nhe</i> I<br>Template: human genomic DNA |
| P800 (+15/+815)  | PCR based blunting    | F(2097):5'-CCGCAGCAGCTCTGGGCTCTTCTCA-3'<br>pGL3b-mutationR:5'-GGTACCTATCGA TAG AGA AAT GTT CTG GC-3'<br>Template: P1258(-470/+815)                                              |
| P676(-140/+815)  | PCR based blunting    | F(2222):5'-GACAACTACACCATCGTGCCTGCTA-3'<br>pGL3b-mutationR:5'-GGTACCTATCGA TAG AGA AAT GTT CTG GC-3'<br>Template: P1258(-470/+815)                                              |
| P397 (+419/+815) | PCR based blunting    | F(2501): 5'-TGTGATG GTCCTATTGTTCTGTTTG-3'<br>pGL3b-mutationR:5'-GGTACCTATCGA TAG AGA AAT GTT CTG GC-3'<br>Template: P1258(-470/+815)                                            |
| P304 (+410/+443) | PCR based blunting    | pGL3b-mutationF: 5'- GCTAGCCCGGGCTCGAGATCTGCGATCT -3'<br>R(2525): 5'- CAAACAAGACAATAGGACCATCACA -3'<br>Template: P676(-140/+815)                                                |
| P223 (+140/+362) | PCR based blunting    | pGL3b-mutationF: 5'- GCTAGCCCGGGCTCGAGATCTGCGATCT -3'<br>R(2444): 5'-GGAGGACAGATGGAGAAGTCAAAGG-3'<br>Template: P676(-140/+815)                                                  |
| P136 (+140/+275) | PCR based blunting    | pGL3b-mutationF: 5'- GCTAGCCCGGGCTCGAGATCTGCGATCT -3'<br>R(2357): 5'- AGAGACCCACGTCCAGCTTCCAGC-3'<br>Template: P676(-140/+815)                                                  |
| P397 –P53M1      | PCR based mutagenesis | ACER2-p53-m1-F: 5'- AAGTCTCTCCTCCCTGGG-3'<br>ACER2-p53-m1-R: 5'- GTCCCGGAAGTTTCACCG-3' wt: CAGG<br>Template: P397 (+419/+815)                                                   |
| P397 –P53M2      | PCR based mutagenesis | ACER2-p53-m2-F: 5'- CCCCACCCCAAGAACAT-3'<br>ACER2-p53-m2-R: 5'- <u>AAAT</u> TCTGCCTGGTGGGAG-3' wt: CAAG<br>Template: P397 (+419/+815)                                           |
| P397 –P53M1+2    | PCR based mutagenesis | ACER2-p53-m2-F: 5'- CCCCACCCCAAGAACAT -3'<br>ACER2-p53-m2-F: 5'- <u>AAAT</u> TCTGCCTGGTGGGAG-3' wt: CAAG<br>Template: P397 –P53M1                                               |

### Supplementary Table 3. Antibodies used in the present study

| <b>Protein name</b>           | <b>Maneufacture (cat. number)</b> | <b>Applications (working dilution)</b> | <b>Website Link</b>                                                                                                                                                                                                                                                                                                 |
|-------------------------------|-----------------------------------|----------------------------------------|---------------------------------------------------------------------------------------------------------------------------------------------------------------------------------------------------------------------------------------------------------------------------------------------------------------------|
| GAPDH                         | Xianzhi Bio(AB-P-R 001)           | IB(1:5000)                             | <a href="http://www.goodhere.com/showproduct.asp?id=320&amp;cl assid=34&amp;nid=2">http://www.goodhere.com/showproduct.asp?id=320&amp;cl assid=34&amp;nid=2</a>                                                                                                                                                     |
| LC3A/B                        | CST(12741)                        | IB(1:2000)<br>IF(1:200)                | <a href="https://www.cellsignal.com/products/primary-antibodies/lc3a-b -d3u4c-xp-rabbit-mab/12741?N=4294956287&amp;Ntt=LC3&amp;from Page=plp">https://www.cellsignal.com/products/primary-antibodies/lc3a-b -d3u4c-xp-rabbit-mab/12741?N=4294956287&amp;Ntt=LC3&amp;from Page=plp</a>                               |
| Flag                          | sigma (F1804)                     | IB(1:2000)<br>IF(1:200)                | <a href="http://www.sigmaaldrich.com/catalog/product/sigma/f1804?lan g=zh&amp;region=CN">http://www.sigmaaldrich.com/catalog/product/sigma/f1804?lan g=zh&amp;region=CN</a>                                                                                                                                         |
| ACER2                         | sigma (HPA014092)                 | IB(1:500)                              | <a href="http://www.sigmaaldrich.com/catalog/product/sigma/hpa01409 2?lang=zh&amp;region=CN">http://www.sigmaaldrich.com/catalog/product/sigma/hpa01409 2?lang=zh&amp;region=CN</a>                                                                                                                                 |
| mTOR                          | CST(2983)                         | IB(1:2000)                             | <a href="https://www.cellsignal.com/products/primary-antibodies/mtor-7 c10-rabbit-mab/2983?N=4294956287&amp;Ntt=mTOR&amp;fromPage =plp">https://www.cellsignal.com/products/primary-antibodies/mtor-7 c10-rabbit-mab/2983?N=4294956287&amp;Ntt=mTOR&amp;fromPage =plp</a>                                           |
| p-mTOR                        | CST(5536)                         | IB(1:2000)                             | <a href="https://www.cellsignal.com/products/primary-antibodies/phosp ho-mtor-ser2448-d9c2-xp-rabbit-mab/5536?N=4294956287&amp; Ntt=P+mTOR&amp;fromPage=plp">https://www.cellsignal.com/products/primary-antibodies/phosp ho-mtor-ser2448-d9c2-xp-rabbit-mab/5536?N=4294956287&amp; Ntt=P+mTOR&amp;fromPage=plp</a> |
| Akt                           | Ruiying Bio(RLT0178)              | IB(1:1000)                             | <a href="http://rlgene.com/showproduct.asp?/1_815">http://rlgene.com/showproduct.asp?/1_815</a>                                                                                                                                                                                                                     |
| p-Akt                         | Ruiying Bio(RLP0006)              | IB(1:500)                              | <a href="http://rlgene.com/showproduct.asp?/1_439">http://rlgene.com/showproduct.asp?/1_439</a>                                                                                                                                                                                                                     |
| antiMouse secondary antibody  | Abgent(ASS1007)                   | IB(1:5000)                             | <a href="http://www.abgent.com/products/ASS1007-Goat-Anti-Mouse-I gGHL-Human-ads-HRP-Secondary-Antibody">http://www.abgent.com/products/ASS1007-Goat-Anti-Mouse-I gGHL-Human-ads-HRP-Secondary-Antibody</a>                                                                                                         |
| antiRabbit secondary antibody | Abgent(ASS1009)                   | IB(1:5000)                             | <a href="http://www.abgent.com/products/ASS1009-Goat-Anti-Rabbit-I gGHL-MouseHuman-ads-HRP-Secondary-Antibody">http://www.abgent.com/products/ASS1009-Goat-Anti-Rabbit-I gGHL-MouseHuman-ads-HRP-Secondary-Antibody</a>                                                                                             |
| antiMouse secondary antibody  | Thermo(A-11031)                   | IF(1:1000)                             | <a href="https://www.thermofisher.com/antibody/product/Goat-anti-Mou se-IgG-H-L-Secondary-Antibody-Polyclonal/A-11031">https://www.thermofisher.com/antibody/product/Goat-anti-Mou se-IgG-H-L-Secondary-Antibody-Polyclonal/A-11031</a>                                                                             |
| antiRabbit secondary antibody | Thermo(A-11034)                   | IF(1:1000)                             | <a href="https://www.thermofisher.com/antibody/product/Goat-anti-Rab bit-IgG-H-L-Secondary-Antibody-Polyclonal/A-11034">https://www.thermofisher.com/antibody/product/Goat-anti-Rab bit-IgG-H-L-Secondary-Antibody-Polyclonal/A-11034</a>                                                                           |
| p53                           | Santa Cruz (SC-126X)              | ChIP(1:500)                            | <a href="http://www.scbt.com/datasheet-126-p53-do-1-antibody.html">http://www.scbt.com/datasheet-126-p53-do-1-antibody.html</a>                                                                                                                                                                                     |
| Normal mouse IgG              | Milpore (12-271)                  | ChIP(1:500)                            | <a href="http://www.merckmillipore.com/CN/zh/product/Normal-Mouse- IgG,MM_NF-12-371">http://www.merckmillipore.com/CN/zh/product/Normal-Mouse- IgG,MM_NF-12-371</a>                                                                                                                                                 |
